# Supplementary material for: Enhanced power factor in the promising thermoelectric material SnPbxTe prepared via zone-melting
Source: Royal Society of Chemistry journal article supplement (doi:10.1039/c5ra08542j), 2015-01-01
Supplement: c5ra08542j1.pdf [file c5ra08542j1.pdf]

## Enhanced power factor in promising thermoelectric material

### SnPb<sub>x</sub>Te prepared via zone-melting

Jun He<sup>a,b</sup>, Jingtao Xu<sup>\*a</sup>, Guoqiang Liu<sup>a</sup>, Xiaojian Tan<sup>a</sup>, Hezhu Shao<sup>a</sup>, Zhu Liu<sup>a</sup>, Jiaqiang Xu<sup>†b</sup>, Jun Jiang<sup>a</sup>, Haochuan Jiang<sup>a</sup>

<sup>a</sup>Ningbo Institute of Materials Technology and Engineering, Chinese Academy of Sciences,  
Ningbo 315201, China.

<sup>b</sup>NEST Lab, Department of Chemistry, College of Sciences, Shanghai University, Shanghai  
200444, China

Table S1. Room temperature densities for the SnPb<sub>x</sub>Te samples in this study.

| Compositions         |            | Theoretical density(g/cm <sup>3</sup> ) | Measured density(g/cm <sup>3</sup> ) | Relative density(%) |
|----------------------|------------|-----------------------------------------|--------------------------------------|---------------------|
| SnPb <sub>x</sub> Te | $x = 0$    | 6.50                                    | 6.36                                 | 97.8                |
|                      | $x = 0.02$ | 6.51                                    | 6.43                                 | 98.8                |
|                      | $x = 0.04$ | 6.53                                    | 6.43                                 | 98.5                |
|                      | $x = 0.06$ | 6.56                                    | 6.44                                 | 98.2                |

---

\* Author to whom correspondence should be addressed. Electronic mail: xujingtao@nimte.ac.cn.

† Author to whom correspondence should be addressed. Electronic mail: xujiaqiang@shu.edu.cn.

Figure S1. (a) Thermal diffusivity  $\lambda$  and (b) Lorenz number  $L$  as a function of temperature for  $\text{SnPb}_x\text{Te}$ .

Figure S2. Thermoelectric properties as a function of temperature, for three different pieces of three samples of SnTe. (a) Electrical conductivity, (b) Seebeck coefficient.

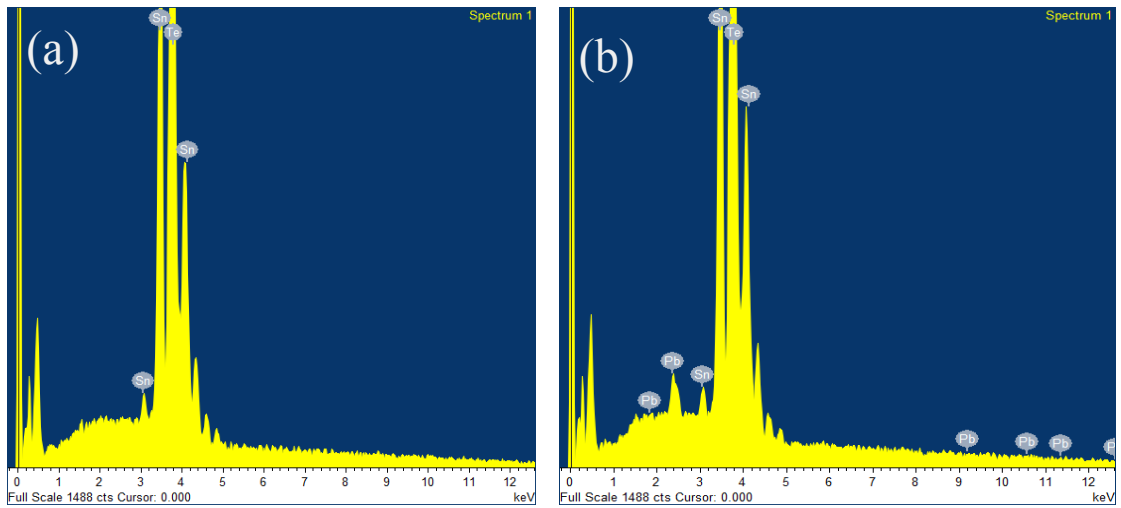

Figure S3 The EDS results for (a) SnTe and (b) SnPb<sub>0.02</sub>Te. The peak for Pb is clearly observed in (b). (c) Composition distribution of ten different parts of SnPb<sub>0.02</sub>Te.
